# Supplementary material for: Sandwiched gold/PNIPAm/gold microstructures for smart plasmonics application: towards the high detection limit and Raman quantitative measurements
Source: Royal Society of Chemistry journal article supplement (doi:10.1039/c7an00419b), 2017-01-01
Supplement: c7an00419b1.pdf [file c7an00419b1.pdf]

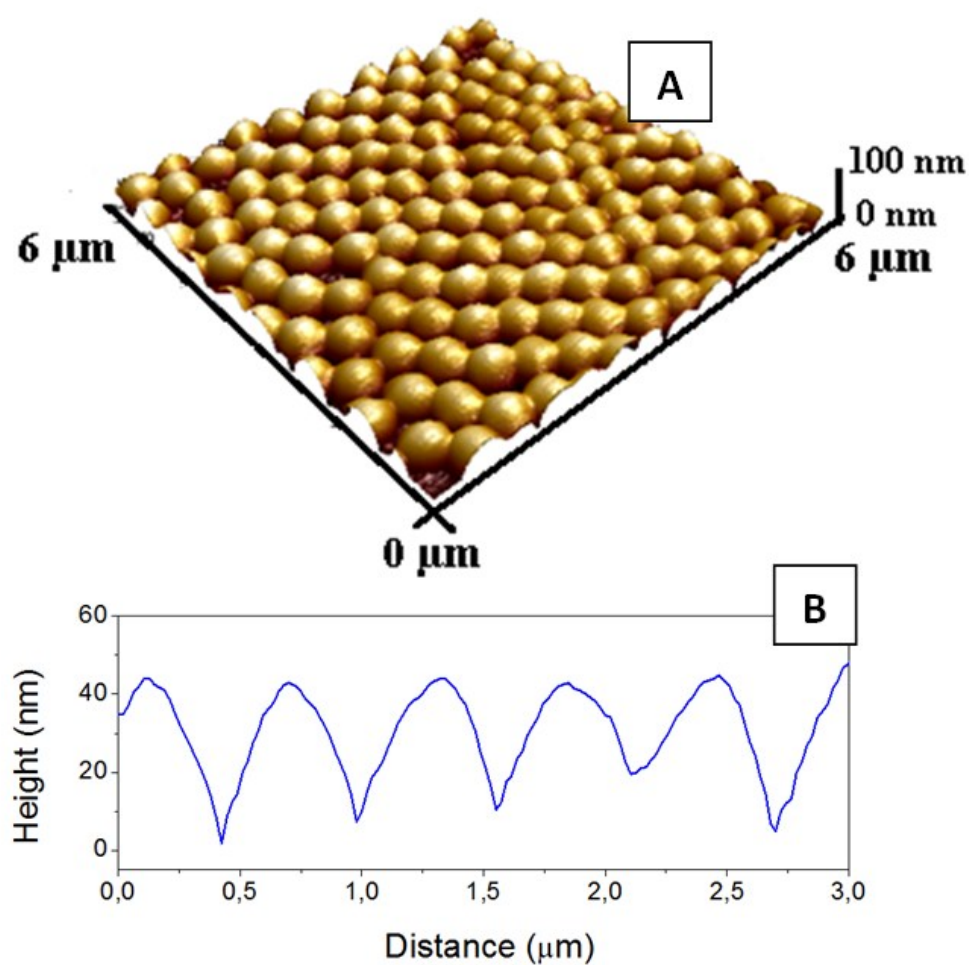

**Fig. S1** – AFM topography (A) and surface profile of sandwich structure measured after the cooling/heating cycle in water.

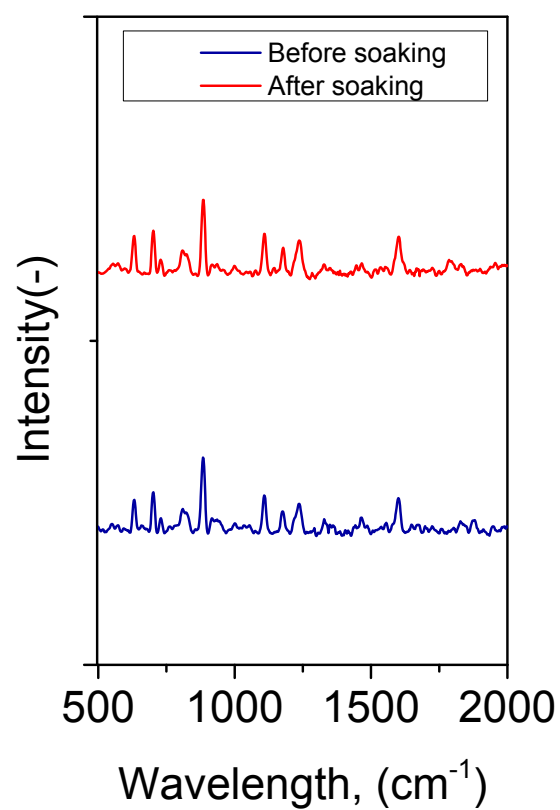

**Fig. S2** – SERS spectra of pristine sandwich structure (PNIPAm response) before and after the cooling/heating cycle in water.

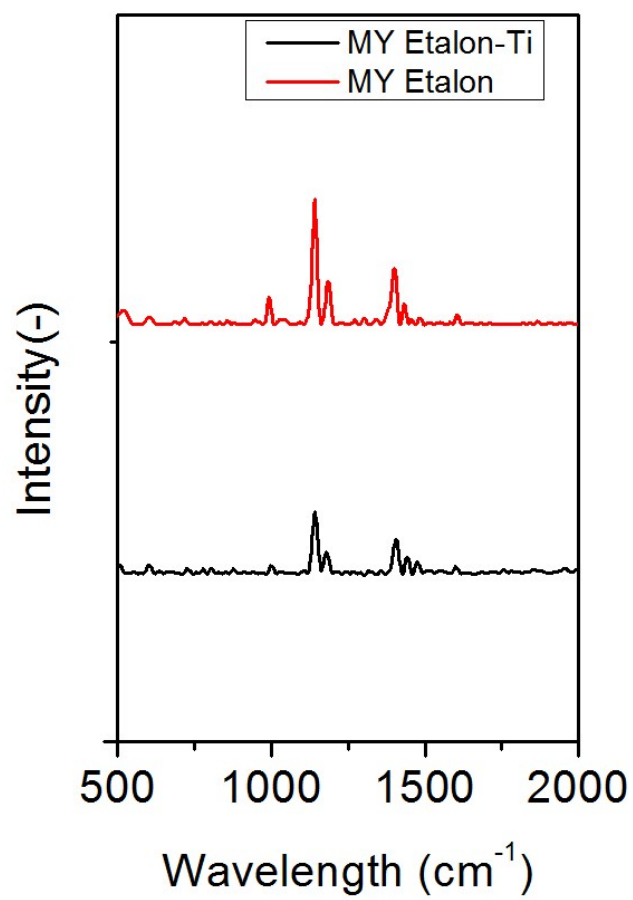

**Fig. S3** Effect of adhesive Ti layer on SERS response of intermediate PNIPAm layer
